# Supplementary material
Source: PubMed Central journal article supplement (PMC3471477)
Supplement: mmc1.pdf [file mmc1.pdf]

Supporting Materials for “Retention of Conformational Entropy upon Calmodulin Binding to Target Peptides is Driven by Transient Salt Bridges” by Dayle M.A. Smith, T.P. Straatsma and Thomas C. Squier

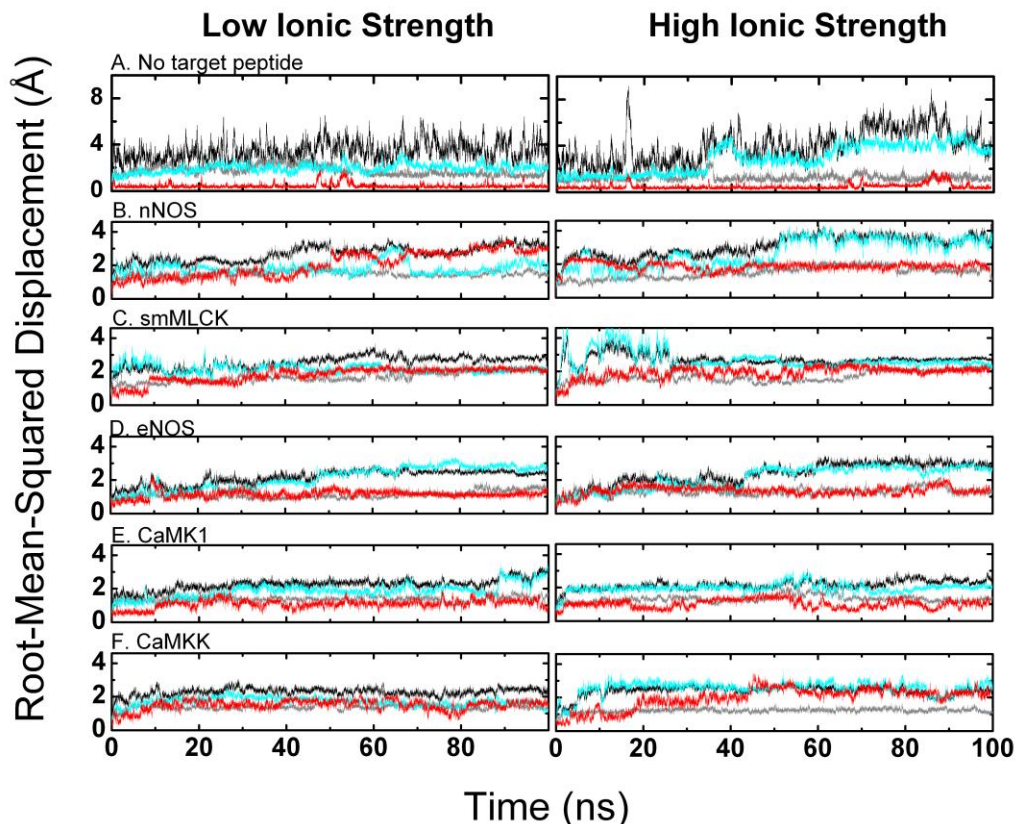

**Figure S1.** Time-dependent changes in root-mean squared displacement (RMSD) at low- (left panels) and high- (right panels) ionic strength of CaM  $C_{\alpha}$  atoms in full length CaM (black lines), C-domain (residues 83-148) (grey lines), N-domain (residues 1-72)(cyan lines), and central linker (residues 73-82) (red lines) in comparison to initial equilibrated calcium-activated CaM (A) or complexes between CaM and target peptides derived from neuronal nitric oxide synthase (nNOS; 2o60.pdb) (B), epithelial nitric oxide synthase (eNOS; 1niw.pdb) (C), smooth myosin light chain kinase (smMLCK, 1qtx.pdb) (D), CaM-dependent protein kinase I (CaMK1; 1mxe.pdb)(E), and CaM-dependent protein kinase kinase (CaMKK; 1ckk.pdb)(F). .

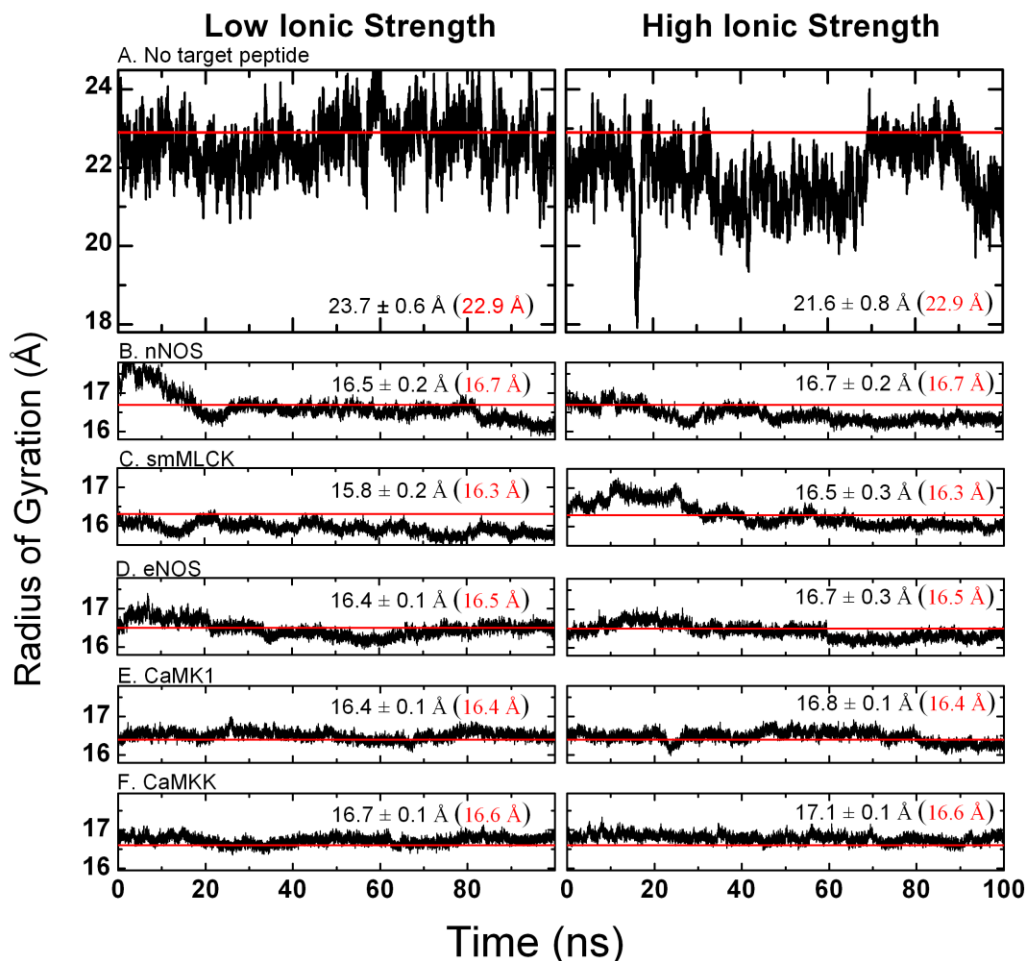

**Figure S2.** Time-dependent changes in radius of gyration (Rg) for CaM backbone atoms at low- (left panels) and high- (right panels) ionic strength for full length CaM calcium-activated CaM (1x02.pdb) (A) and following association with target peptides derived from neuronal nitric oxide synthase (nNOS; 2o60.pdb) (B), epithelial nitric oxide synthase (eNOS; 1niw.pdb) (C), smooth myosin light chain kinase (smMLCK, 1qtx.pdb) (D), CaM-dependent protein kinase I (CaMK1; 1mxe.pdb)(E), and CaM-dependent protein kinase kinase (CaMKK; 1ckk.pdb)(F). Average radius of gyration from simulations (black numbers); Rg calculated from high-resolution structures (red numbers).

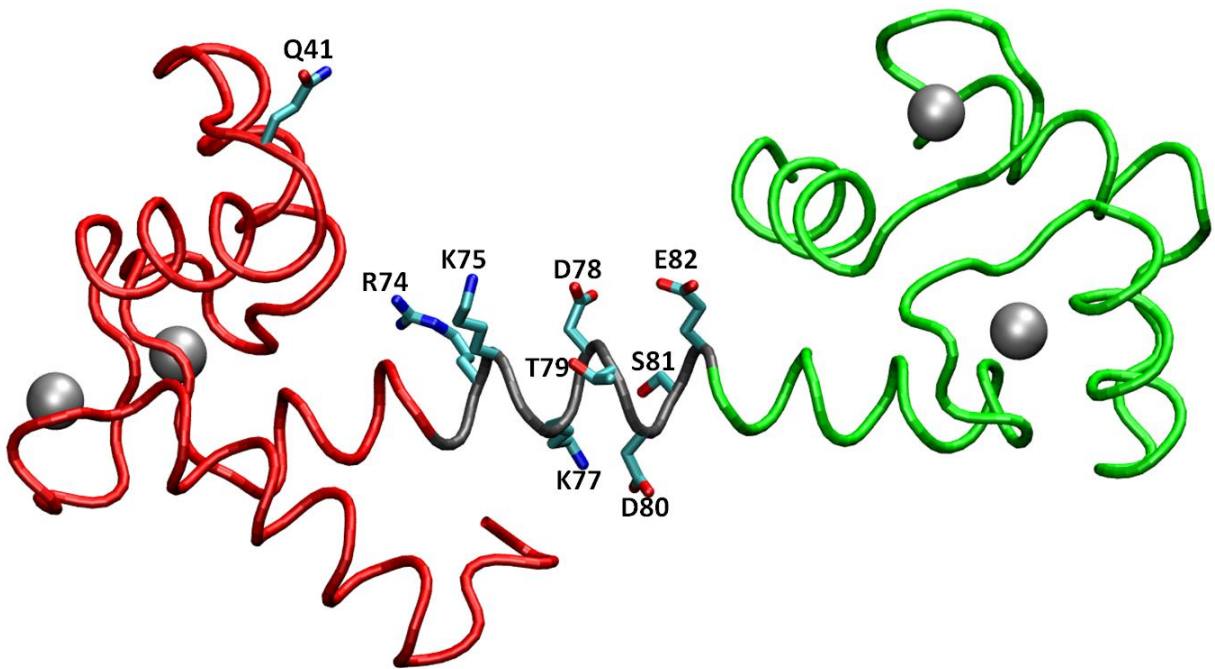

**Figure S3.** Conformationally-sensitive CaM sidechains referred to in Figure 1 (shown as sticks). Red: CaM N-domain; Green: CaM C-domain; Grey: CaM central linker.

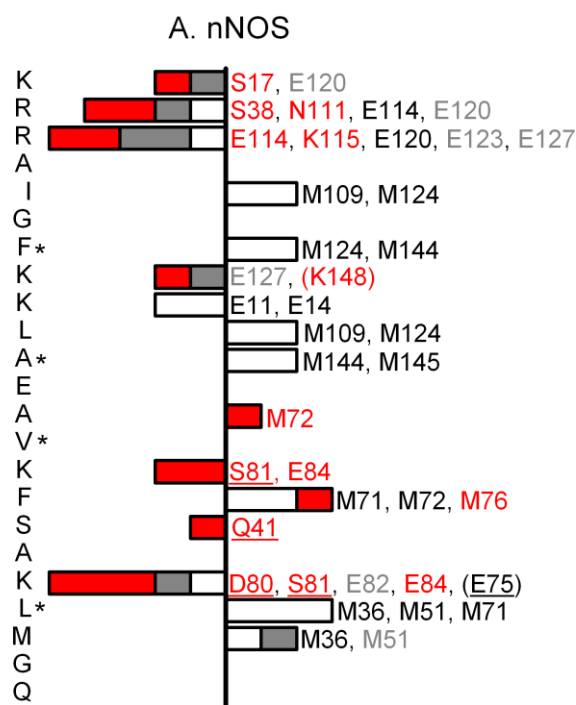

**Figure S4:** *Ionic Strength Dependence of Contact Side-Chain Interactions.* Specific contact interactions within 4 Å between side-chains in target peptides (sequence is indicated on left) and CaM. Polar (left direction) or hydrophobic Met (right direction) contact interactions between side-chains in CaM and indicated target peptide that are independent of ionic strength (open bars) or present only at low- (gray bars) or high- (red bars) ionic strengths (more red or grey bars in the left direction correspond to a greater number of ionic strength dependent polar CaM-target sidechain interactions). Data plotted from Table S2. Residues indicated with parentheses are electrostatically repulsive CaM-target sidechain interactions. Underlined residues are those described in the article text. Asterisks refer to each target's binding motifs from the literature (eNOS and nNOS have a 1-5-8-14 CaM binding motif, smMLCK has a 1-8-14 motif, CaMKK has a 1-16 motif, and CaMK1 is 1-5-10; see article text for references).

Figure S4, cont'd.

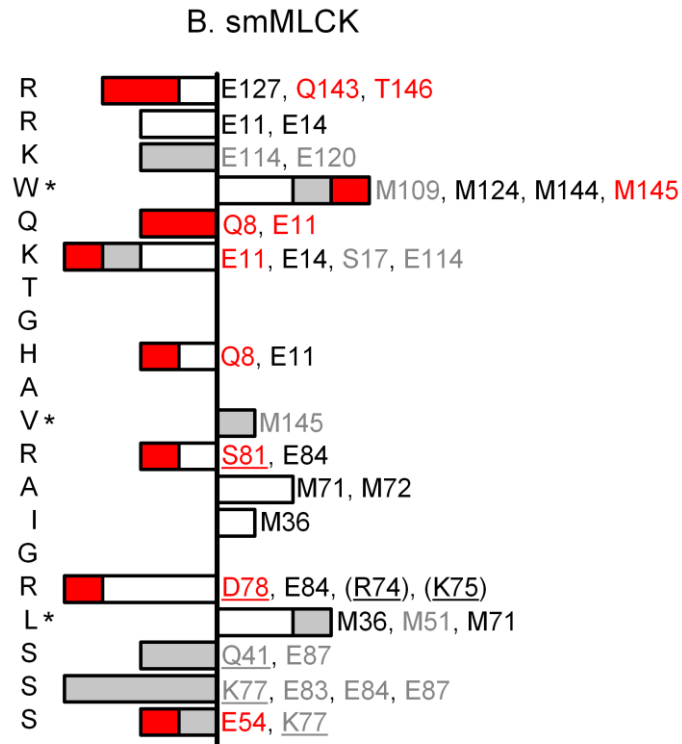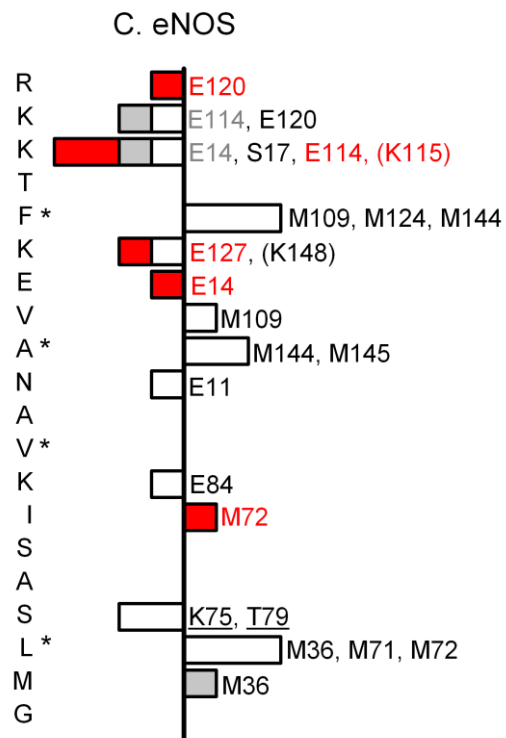

Figure S4, cont'd.

D. CaMK1

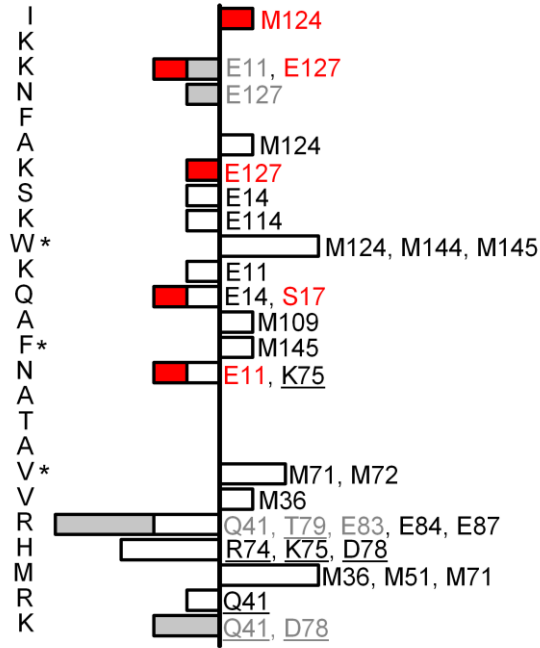

E. CaMKK

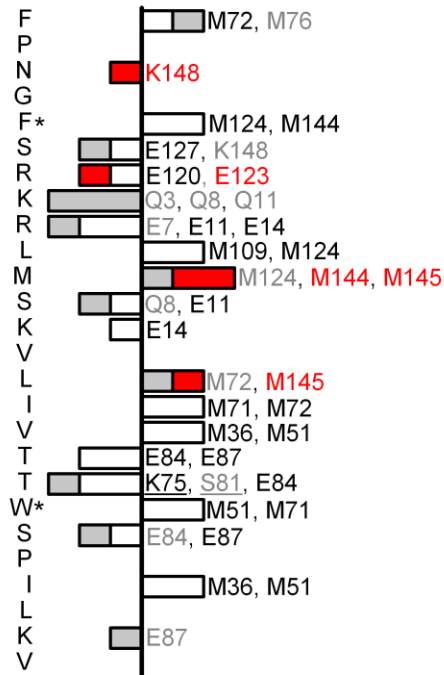

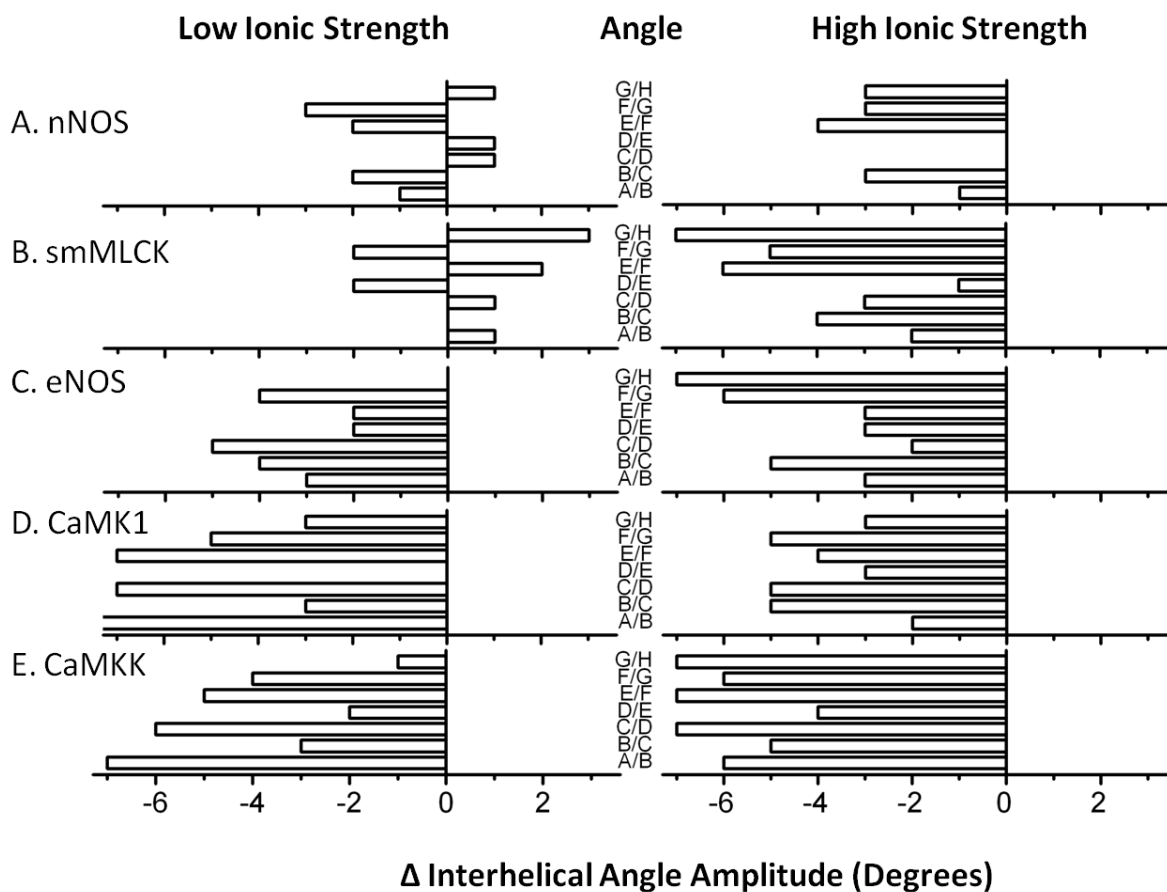

**Figure S5:** Amplitude changes upon target binding in the inter-helical bending for CaM in complex with target peptides for indicated helices. Data taken from Table S5.

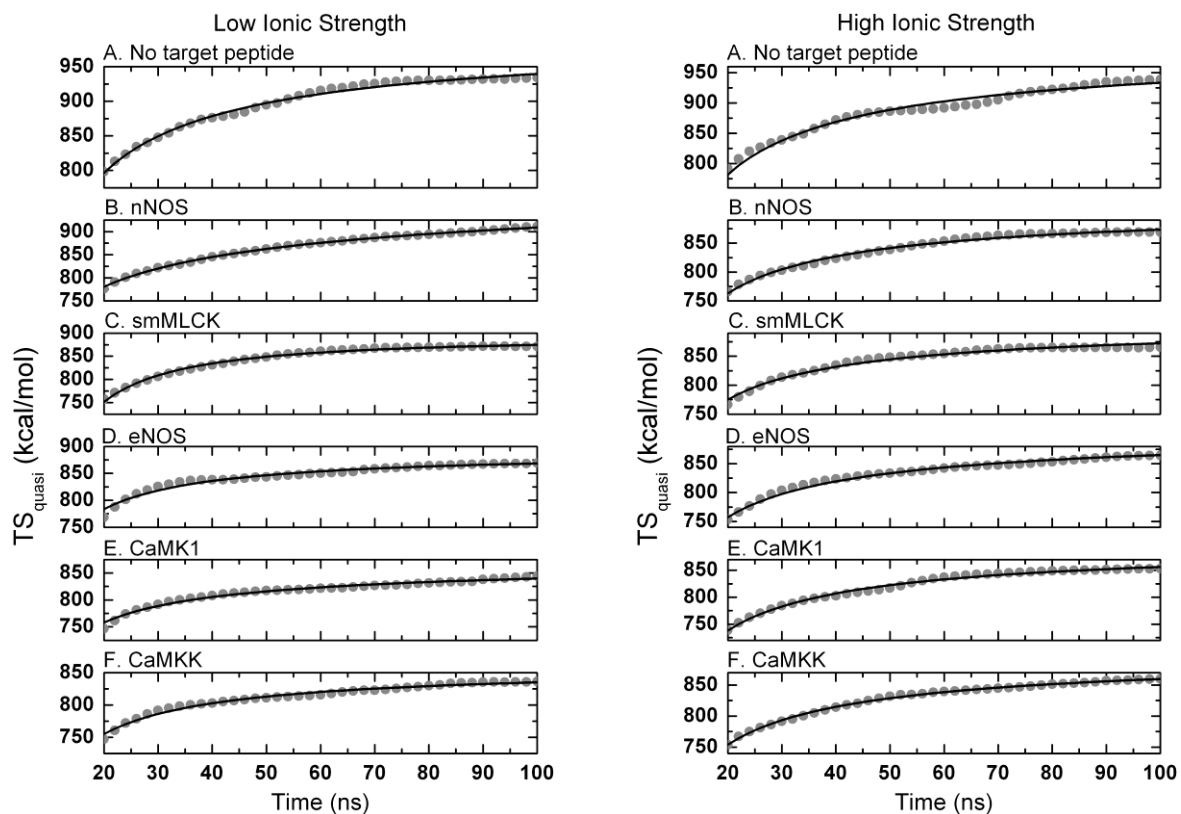

**Figure S6:** Extrapolation of absolute quasi-harmonic entropies calculated from CaM backbone atom fluctuations (kcal/mol) at infinite simulation time (ns) from fitting to  $TS(t) = TS_{\infty} - At^{-n}$ . Grey circles are quasi-harmonic entropies at 300 K calculated for CaM backbone atoms from 10 to  $t$  ns in 2 ns increments. Black lines are the fitted curves. Panel A: unbound CaM; Panels B-F: CaM bound to target peptides. See Table S7 for results from the least-squares fit.



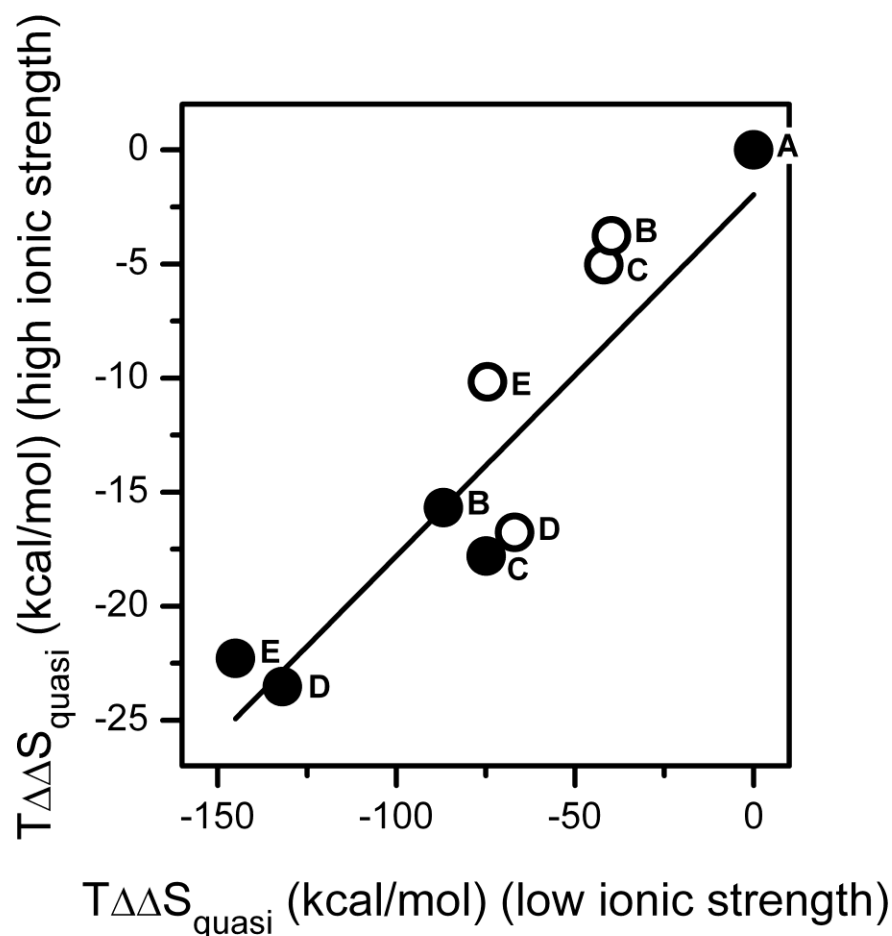

**Figure S7:** *Ionic Strength Dependent Changes in Calculated Quasiharmonic Conformational Entropy are Proportional for Backbone and Sidechain Motions.* Target-dependent differences in quasiharmonic conformational entropy ( $T\Delta\Delta S_{\text{conf}}$ , relative to nNOS-CaM) calculated for backbone atoms (open circles) or all CaM heavy atoms (filled circles) between complexes of calcium-activated CaM bound to different target peptides at low and high ionic strengths. Points are labeled according to peptide targets: (A) neuronal nitric oxide synthase (nNOS; 2o60.pdb); (B), smooth myosin light chain kinase (smMLCK, 1qtx.pdb); (C), epithelial nitric oxide synthase (eNOS; 1niw.pdb); (D), CaM-dependent protein kinase I (CaMK1; 1mxe.pdb); (E), and CaM-dependent protein kinase kinase (CaMKK; 1ckk.pdb)(F). Line represents nonlinear least squares fit to the data, where  $R^2 = 0.87$  and slope = 0.17.

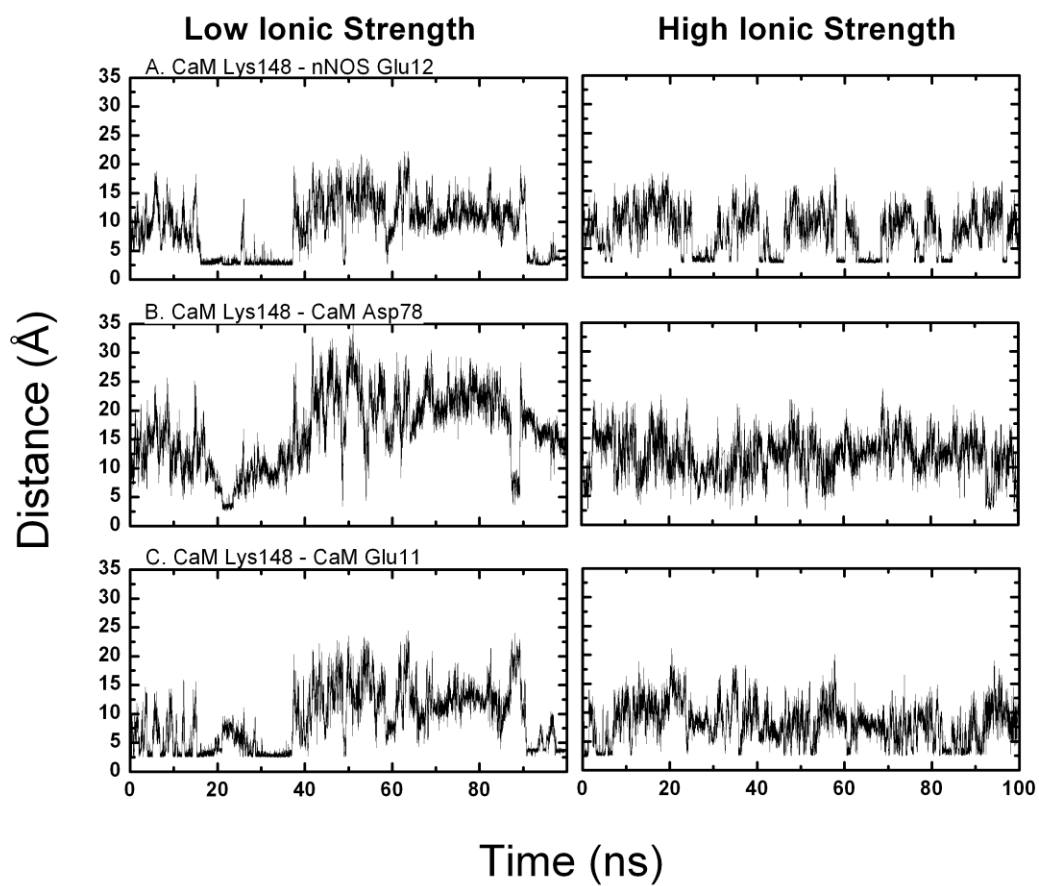

**Figure S8.** Distances between Lys148 at the C-terminus of CaM with Glu12 in the target peptide (A), Asp78 in the central linker of CaM (B), or Glu11 in the N-domain of CaM (C) at low (left panels) and high (right panels) ionic strength.

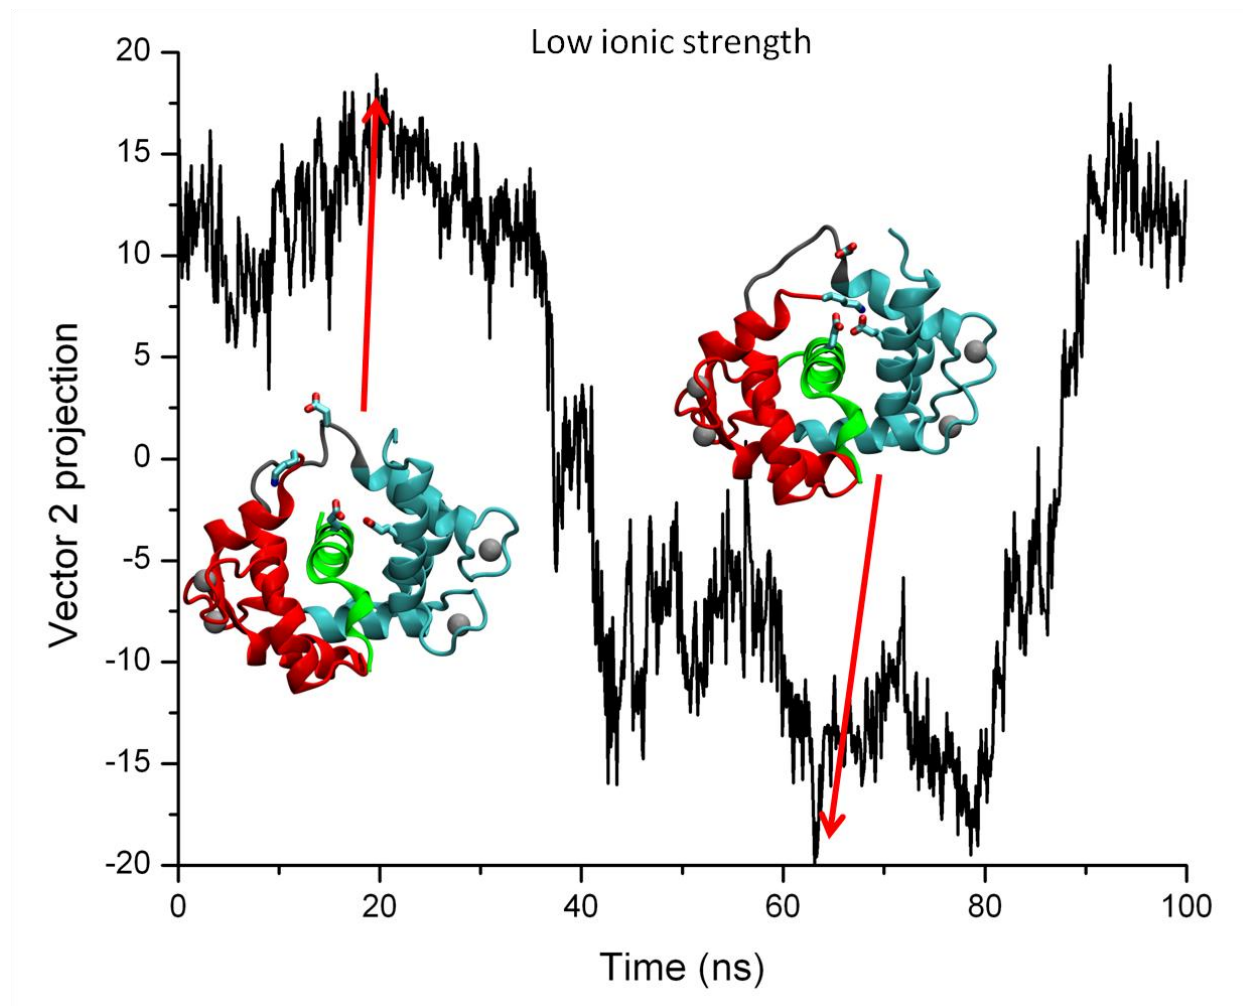

**Figure S9:** Eigenvector projections for first nNOS-CaM eigenvector that includes transient salt bridge movements. Covariance analysis was done on full CaM and bound nNOS heavy atoms after superimposing CaM backbone atoms. nNOS-CaM structures at the eigenvector extremes are shown in ribbons format. Red: CaM N-domain; cyan: CaM C-domain; grey: CaM linker; Green: nNOS peptide. Calcium ions are shown as silver Van der Waals spheres.

Figure S9, cont'd.

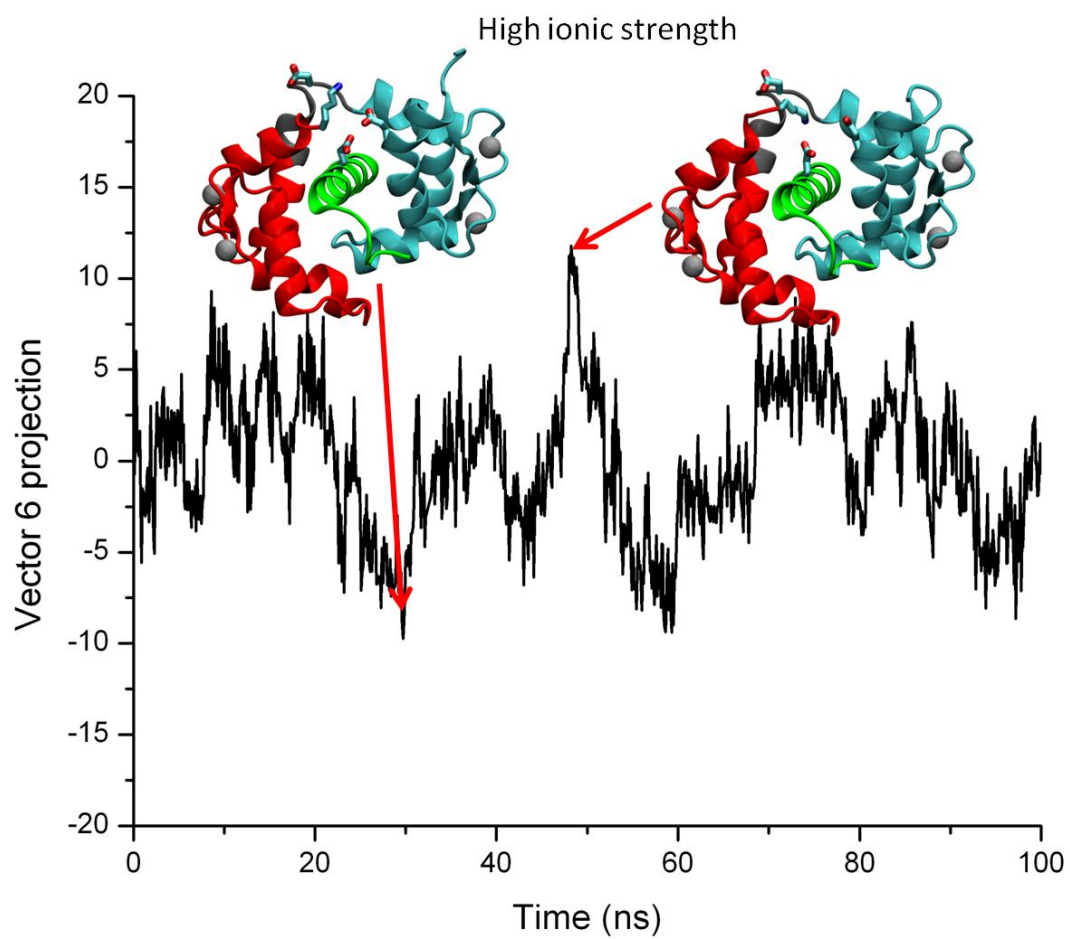

**Table S1:** Solvated protein system specifications.

| System     | PDB ID | solute atoms | initial cubic box side (Å) | low ionic strength set |                      | high ionic strength set |                     |                      |
|------------|--------|--------------|----------------------------|------------------------|----------------------|-------------------------|---------------------|----------------------|
|            |        |              |                            | water molecules        | Na <sup>+</sup> ions | water molecules         | K <sup>+</sup> ions | Cl <sup>-</sup> ions |
| CaMKK-CaM  | 1CKK   | 2721         | 81.54                      | 16,890                 | 11                   | 16,810                  | 51                  | 40                   |
| CaMK1-CaM  | 1MXE   | 2712         | 82.08                      | 17,346                 | 8                    | 17,262                  | 50                  | 42                   |
| eNOS-CaM   | 1NIW   | 2594         | 83.27                      | 18,112                 | 12                   | 18,030                  | 53                  | 41                   |
| smMLCK-CaM | 1QTX   | 2606         | 81.19                      | 16,688                 | 10                   | 16,610                  | 49                  | 39                   |
| nNOS-CaM   | 2O60   | 2658         | 81.44                      | 16,908                 | 10                   | 16,830                  | 49                  | 39                   |
| CaM        | 1X02   | 2266         | 97.90                      | 35,192                 | 16                   | 35,046                  | 89                  | 73                   |

**Table S2:** Selected CaM-target contacts less than 4 Å calculated from mean closest distance analysis. The majority of complexes involve the same antiparallel binding mechanism in which the N-domain of CaM binds toward the C-terminus of the peptide; in the case of CaMKK binding involves a parallel binding mechanism where the N-domain of CaM binds toward the N-terminus of the peptide. Residues indicated with parentheses are electrostatically repulsive CaM-target sidechain interactions. Highlighted residues refer to each target's binding motifs from the literature. eNOS and nNOS have a 1-5-8-14 CaM binding motif, smMLCK has a 1-8-14 motif, CaMKK has a 1-16 motif, and CaMK1 is 1-5-10. See text for references.







**Table S3:** Interactions between target sidechains and conformationally-sensitive CaM sidechains calculated from < 4.0 Å minimum distance analysis described in Figure 1.

| High ionic strength simulation set |         |    |            |    |                              |
|------------------------------------|---------|----|------------|----|------------------------------|
| target                             | CaM res |    | target res |    | Average minimum distance (Å) |
| CaMKK                              | LYS     | 75 | THR        | 8  | 2.70±0.90                    |
| CaMK1                              | GLN     | 41 | ARG        | 24 | 3.00±0.60                    |
| CaMK1                              | ARG     | 74 | HIS        | 22 | 2.20±0.50                    |
| CaMK1                              | LYS     | 75 | HIS        | 22 | 2.50±0.20                    |
| CaMK1                              | ASP     | 78 | HIS        | 22 | 2.30±0.60                    |
| eNOS                               | LYS     | 75 | SER        | 17 | 2.70±0.50                    |
| eNOS                               | THR     | 79 | SER        | 17 | 2.80±0.80                    |
| smMLCK                             | ARG     | 74 | ARG        | 16 | 4.00±0.50                    |
| smMLCK                             | LYS     | 75 | ARG        | 16 | 3.60±0.50                    |
| smMLCK                             | ASP     | 78 | ARG        | 16 | 3.00±0.60                    |
| smMLCK                             | SER     | 81 | ARG        | 12 | 2.90±1.00                    |
| nNOS                               | GLN     | 41 | SER        | 17 | 2.60±0.30                    |
| nNOS                               | LYS     | 75 | LYS        | 19 | 2.90±0.70                    |
| nNOS                               | ASP     | 80 | LYS        | 19 | 3.80±1.20                    |
| nNOS                               | SER     | 81 | LYS        | 15 | 2.50±0.40                    |

Table S3, cont'd.

| Low ionic strength simulation set |         |    |            |    |                              |  |
|-----------------------------------|---------|----|------------|----|------------------------------|--|
| target                            | CaM res |    | target res |    | Average minimum distance (Å) |  |
| CaMKK                             | LYS     | 75 | THR        | 8  | 2.30±0.20                    |  |
| CaMK1                             | GLN     | 41 | ARG        | 24 | 2.50±0.30                    |  |
| CaMK1                             | ARG     | 74 | HIS        | 22 | 2.10±0.30                    |  |
| CaMK1                             | LYS     | 75 | HIS        | 22 | 2.50±0.20                    |  |
| CaMK1                             | ASP     | 78 | HIS        | 22 | 2.10±0.40                    |  |
| CaMK1                             | ASP     | 78 | LYS        | 25 | 2.80±1.60                    |  |
| CaMK1                             | THR     | 79 | ARG        | 21 | 2.90±0.70                    |  |
| eNOS                              | LYS     | 75 | SER        | 17 | 2.40±0.30                    |  |
| eNOS                              | THR     | 79 | SER        | 17 | 2.80±1.00                    |  |
| smMLCK                            | GLN     | 41 | SER        | 18 | 2.10±0.40                    |  |
| smMLCK                            | ARG     | 74 | ARG        | 16 | 2.80±0.50                    |  |
| smMLCK                            | LYS     | 77 | ARG        | 16 | 2.90±1.20                    |  |
| smMLCK                            | LYS     | 77 | SER        | 19 | 2.70±0.90                    |  |
| smMLCK                            | LYS     | 77 | SER        | 20 | 3.00±1.00                    |  |
| nNOS                              | LYS     | 75 | LYS        | 19 | 2.80±0.60                    |  |
| nNOS                              | ASP     | 80 | LYS        | 19 | 1.90±0.20                    |  |
| nNOS                              | GLU     | 82 | LYS        | 19 | 2.70±1.40                    |  |

**Table S4:** Coulomb interaction energy between CaM and target sidechains in smMLCK and nNOS.

| High ionic strength simulation set |  |         |    |  |            |    |                                |
|------------------------------------|--|---------|----|--|------------|----|--------------------------------|
| target                             |  | CaM res |    |  | Target res |    | Coulomb interaction (kcal/mol) |
| smMLCK                             |  | ARG     | 74 |  | ARG        | 16 | 0.56±0.28                      |
| smMLCK                             |  | LYS     | 75 |  | ARG        | 16 | 1.47±0.98                      |
| nNOS                               |  | LYS     | 75 |  | LYS        | 19 | 2.20±1.00                      |
|                                    |  |         |    |  |            |    |                                |
| Low ionic strength simulation set  |  |         |    |  |            |    |                                |
| target                             |  | CaM res |    |  | Target res |    | Coulomb interaction (kcal/mol) |
| smMLCK                             |  | ARG     | 74 |  | ARG        | 16 | 2.41±1.36                      |
| smMLCK                             |  | LYS     | 77 |  | ARG        | 16 | 1.67±0.94                      |
| nNOS                               |  | LYS     | 75 |  | LYS        | 19 | 2.03±2.07                      |

**Table S5:** Inter-helical angles for unbound, Ca<sup>2+</sup>-saturated CaM and CaM bound to targets indicated (averages, standard deviations and amplitudes) from simulations using low and high ionic strength conditions.

|           | angle | Low Ionic Strength |       |           | High Ionic Strength |       |           |
|-----------|-------|--------------------|-------|-----------|---------------------|-------|-----------|
|           |       | avg                | stdev | amplitude | avg                 | stdev | amplitude |
| CaMKK     | AB    | 98                 | 3     | 8         | 97                  | 3     | 9         |
| CaMK1     |       | 79                 | 2     | 7         | 90                  | 7     | 13        |
| smMLCK    |       | 96                 | 6     | 16        | 87                  | 6     | 13        |
| eNOS      |       | 90                 | 5     | 12        | 89                  | 8     | 12        |
| nNOS      |       | 86                 | 8     | 14        | 86                  | 7     | 14        |
| no target |       | 85                 | 7     | 15        | 89                  | 7     | 15        |
| CaMKK     | BC    | 92                 | 4     | 11        | 87                  | 7     | 12        |
| CaMK1     |       | 86                 | 4     | 11        | 94                  | 7     | 12        |
| smMLCK    |       | 87                 | 8     | 14        | 97                  | 6     | 13        |
| eNOS      |       | 92                 | 5     | 10        | 94                  | 5     | 12        |
| nNOS      |       | 85                 | 6     | 12        | 91                  | 7     | 14        |
| no target |       | 92                 | 7     | 14        | 92                  | 8     | 17        |
| CaMKK     | CD    | 83                 | 4     | 9         | 85                  | 5     | 9         |
| CaMK1     |       | 100                | 2     | 8         | 88                  | 6     | 11        |
| smMLCK    |       | 85                 | 8     | 16        | 88                  | 7     | 13        |
| eNOS      |       | 88                 | 4     | 10        | 88                  | 9     | 14        |
| nNOS      |       | 95                 | 8     | 16        | 92                  | 6     | 16        |
| no target |       | 93                 | 8     | 15        | 90                  | 7     | 16        |
| CaMKK     | DE    | 84                 | 4     | 10        | 84                  | 5     | 11        |
| CaMK1     |       | 92                 | 5     | 12        | 90                  | 7     | 12        |
| smMLCK    |       | 83                 | 5     | 11        | 94                  | 6     | 14        |
| eNOS      |       | 87                 | 5     | 10        | 92                  | 6     | 12        |
| nNOS      |       | 83                 | 6     | 13        | 93                  | 8     | 15        |
| no target |       | 93                 | 4     | 12        | 91                  | 9     | 15        |
| CaMKK     | EF    | 100                | 4     | 9         | 95                  | 5     | 10        |
| CaMK1     |       | 80                 | 3     | 7         | 94                  | 8     | 13        |
| smMLCK    |       | 97                 | 8     | 16        | 94                  | 5     | 11        |
| eNOS      |       | 95                 | 5     | 12        | 92                  | 10    | 14        |
| nNOS      |       | 91                 | 7     | 14        | 87                  | 6     | 13        |
| no target |       | 97                 | 5     | 14        | 93                  | 9     | 17        |
| CaMKK     | FG    | 89                 | 5     | 11        | 92                  | 6     | 11        |
| CaMK1     |       | 90                 | 3     | 10        | 84                  | 6     | 12        |
| smMLCK    |       | 95                 | 7     | 13        | 81                  | 4     | 12        |
| eNOS      |       | 86                 | 6     | 11        | 85                  | 6     | 11        |
| nNOS      |       | 91                 | 6     | 12        | 87                  | 8     | 14        |
| no target |       | 94                 | 8     | 15        | 91                  | 9     | 17        |
| CaMKK     | GH    | 80                 | 5     | 12        | 84                  | 6     | 11        |
| CaMK1     |       | 99                 | 4     | 10        | 89                  | 9     | 15        |
| smMLCK    |       | 82                 | 7     | 16        | 92                  | 4     | 11        |
| eNOS      |       | 87                 | 6     | 13        | 92                  | 6     | 11        |
| nNOS      |       | 88                 | 8     | 14        | 94                  | 7     | 15        |
| no target |       | 83                 | 7     | 13        | 86                  | 9     | 18        |

**Table S6:** Experimental conformational entropies (Frederick, K. K., Marlow, M. S., Valentine, K. G., and Wand, A. J. (2007), *Nature* 448, 325-329) and calculated quasiharmonic entropies. TAS is relative to unbound CaM; TΔS is relative to nNOS-CaM.

| <b>Experimental conformational entropies (kcal/mol)</b>           |                       |            |            |            |
|-------------------------------------------------------------------|-----------------------|------------|------------|------------|
|                                                                   | <b>target peptide</b> | <b>TΔS</b> | <b>TΔS</b> |            |
|                                                                   | nNOS                  | -3.80      |            |            |
|                                                                   | smMLCK                | -13.12     | -9.32      |            |
|                                                                   | eNOS                  | -11.02     | -7.22      |            |
|                                                                   | CaMK1                 | -15.77     | -11.97     |            |
|                                                                   | CaMKK                 | -15.18     | -11.38     |            |
| <b>Quasiharmonic entropies (kcal/mol) for CaM backbone atoms</b>  |                       |            |            |            |
| <b>MD conditions</b>                                              | <b>target peptide</b> | <b>TS</b>  | <b>TΔS</b> | <b>TΔS</b> |
| low ionic strength                                                | nNOS                  | 910.86     | -23.34     |            |
|                                                                   | smMLCK                | 871.04     | -63.15     | -39.82     |
|                                                                   | eNOS                  | 868.96     | -65.23     | -41.90     |
|                                                                   | CaMK1                 | 843.95     | -90.24     | -66.90     |
|                                                                   | CaMKK                 | 836.36     | -97.84     | -74.50     |
|                                                                   | no target peptide     | 934.19     |            |            |
| high ionic strength                                               | nNOS                  | 869.41     | -68.93     |            |
|                                                                   | smMLCK                | 865.60     | -72.75     | -3.81      |
|                                                                   | eNOS                  | 864.36     | -73.98     | -5.05      |
|                                                                   | CaMK1                 | 852.89     | -85.45     | -16.52     |
|                                                                   | CaMKK                 | 859.65     | -78.69     | -9.76      |
|                                                                   | no target peptide     | 938.35     |            |            |
| <b>Quasiharmonic entropies (kcal/mol) for all CaM heavy atoms</b> |                       |            |            |            |
| <b>MD conditions</b>                                              | <b>target peptide</b> | <b>TS</b>  | <b>TΔS</b> | <b>TΔS</b> |
| low ionic strength                                                | nNOS                  | 2274.08    | -72.07     |            |
|                                                                   | smMLCK                | 2187.25    | -158.91    | -86.84     |
|                                                                   | eNOS                  | 2199.21    | -146.95    | -74.88     |
|                                                                   | CaMK1                 | 2142.21    | -203.95    | -131.87    |
|                                                                   | CaMKK                 | 2129.06    | -217.10    | -145.02    |
|                                                                   | no target peptide     | 2346.16    |            |            |
| high ionic strength                                               | nNOS                  | 2206.48    | -139.17    |            |
|                                                                   | smMLCK                | 2190.80    | -154.85    | -15.68     |
|                                                                   | eNOS                  | 2188.68    | -156.97    | -17.80     |
|                                                                   | CaMK1                 | 2182.96    | -162.69    | -23.53     |
|                                                                   | CaMKK                 | 2184.19    | -161.46    | -22.29     |
|                                                                   | no target peptide     | 2345.65    |            |            |

**Table S7:** Extrapolation of absolute quasiharmonic entropies calculated from CaM backbone atom fluctuations (kcal/mol) at infinite simulation time (ns) from fitting to  $TS(t) = TS_{\infty} - At^{-n}$ . Quasiharmonic entropies were calculated at 300 K from 10 to  $t$  ns in 2 ns increments.  $TS_{\infty}$ ,  $A$  and  $n$  are fitting parameters;  $R^2$  is the goodness-of-fit;  $TS_{100}$  is the quasiharmonic entropy calculated from 10-100 ns (Table S6). Fitted curves are plotted in Figure S6.

| <b>High Ionic Strength</b> |                                 |          |          |                         |                                          |
|----------------------------|---------------------------------|----------|----------|-------------------------|------------------------------------------|
| <b>CaM target</b>          | <b><math>TS_{\infty}</math></b> | <b>A</b> | <b>n</b> | <b><math>R^2</math></b> | <b><math>TS_{100}/TS_{\infty}</math></b> |
| no target peptide          | 1001.89                         | 1934.15  | 0.73     | 0.98                    | 0.94                                     |
| nNOS                       | 919.60                          | 1522.17  | 0.76     | 0.99                    | 0.95                                     |
| smMLCK                     | 913.41                          | 1344.98  | 0.76     | 0.98                    | 0.95                                     |
| eNOS                       | 913.10                          | 1389.74  | 0.73     | 0.99                    | 0.95                                     |
| CaMK1                      | 904.12                          | 1680.24  | 0.77     | 0.99                    | 0.94                                     |
| CaMKK                      | 905.82                          | 1398.63  | 0.74     | 1.00                    | 0.95                                     |
|                            |                                 |          |          |                         |                                          |
| <b>Low Ionic Strength</b>  |                                 |          |          |                         |                                          |
| <b>CaM target</b>          | <b><math>TS_{\infty}</math></b> | <b>A</b> | <b>n</b> | <b><math>R^2</math></b> | <b><math>TS_{100}/TS_{\infty}</math></b> |
| no target peptide          | 1004.07                         | 1823.27  | 0.73     | 0.99                    | 0.93                                     |
| nNOS                       | 1035.51                         | 928.99   | 0.43     | 1.00                    | 0.88                                     |
| smMLCK                     | 893.32                          | 6276.52  | 1.27     | 0.99                    | 0.98                                     |
| eNOS                       | 891.51                          | 1901.56  | 0.96     | 0.97                    | 0.97                                     |
| CaMK1                      | 874.61                          | 1085.41  | 0.75     | 0.98                    | 0.96                                     |
| CaMKK                      | 862.93                          | 1341.83  | 0.84     | 0.98                    | 0.97                                     |
